# Supplementary material for: Solid-state polymer electrolytes for high-performance lithium metal batteries
Source: PubMed Central journal article supplement (PMC6765010; doi:10.1038/s41467-019-12423-y), 2019-09-27
Supplement: 41467_2019_12423_MOESM1_ESM.pdf [file 41467_2019_12423_MOESM1_ESM.pdf]

**Supplementary Information**

**Solid-state Polymer Electrolytes for High-performance Lithium Metal  
Batteries**

Snehashis Choudhury et al.

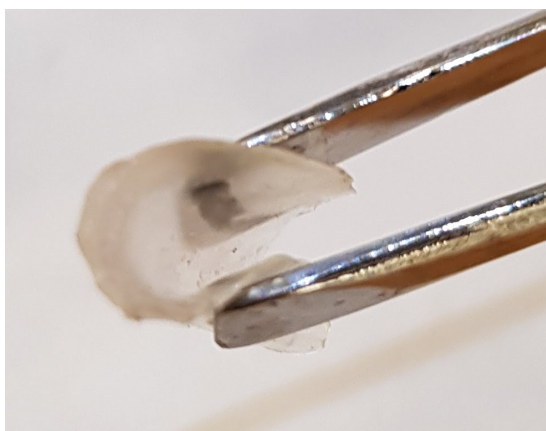

**Supplementary Fig. 1:** Photograph of the flexible crosslinked membrane.

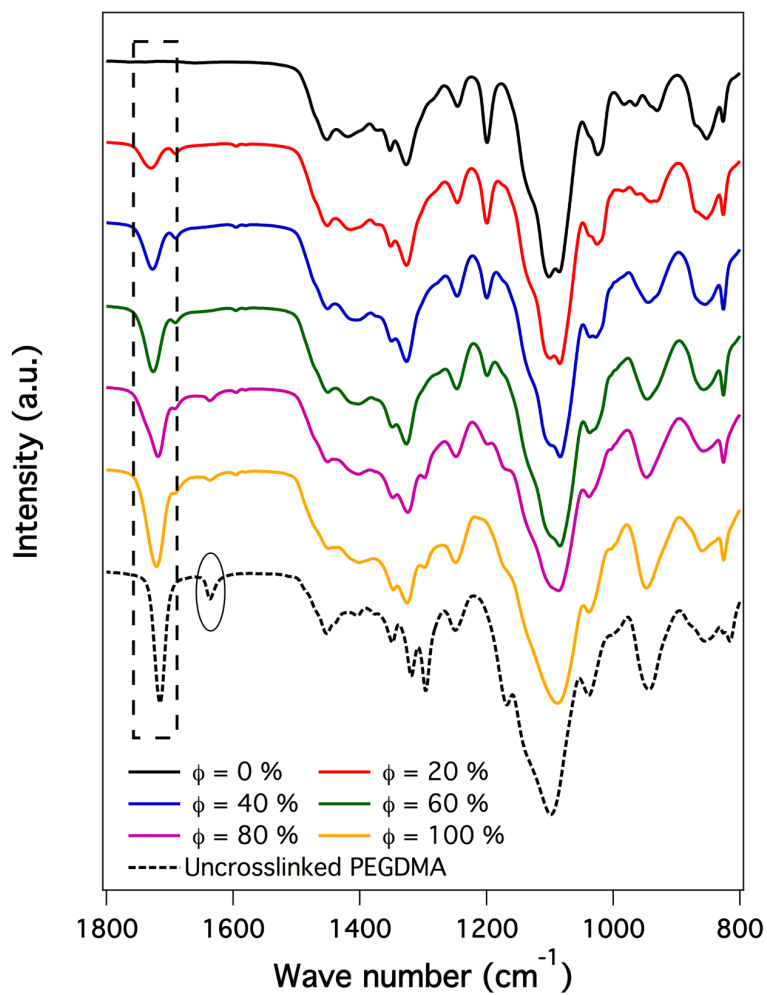

**Supplementary Fig. 2:** FTIR analysis of the crosslinked membrane at various PEGDMA content that shows C=O bond (at  $1,700\text{ cm}^{-1}$ ) shifting to lower intensity values as the volume percent PEGDMA is increased in solution. The circle marks the C=C bond (at  $1650\text{ cm}^{-1}$ ) that is only presented in the unreacted methacrylate groups.

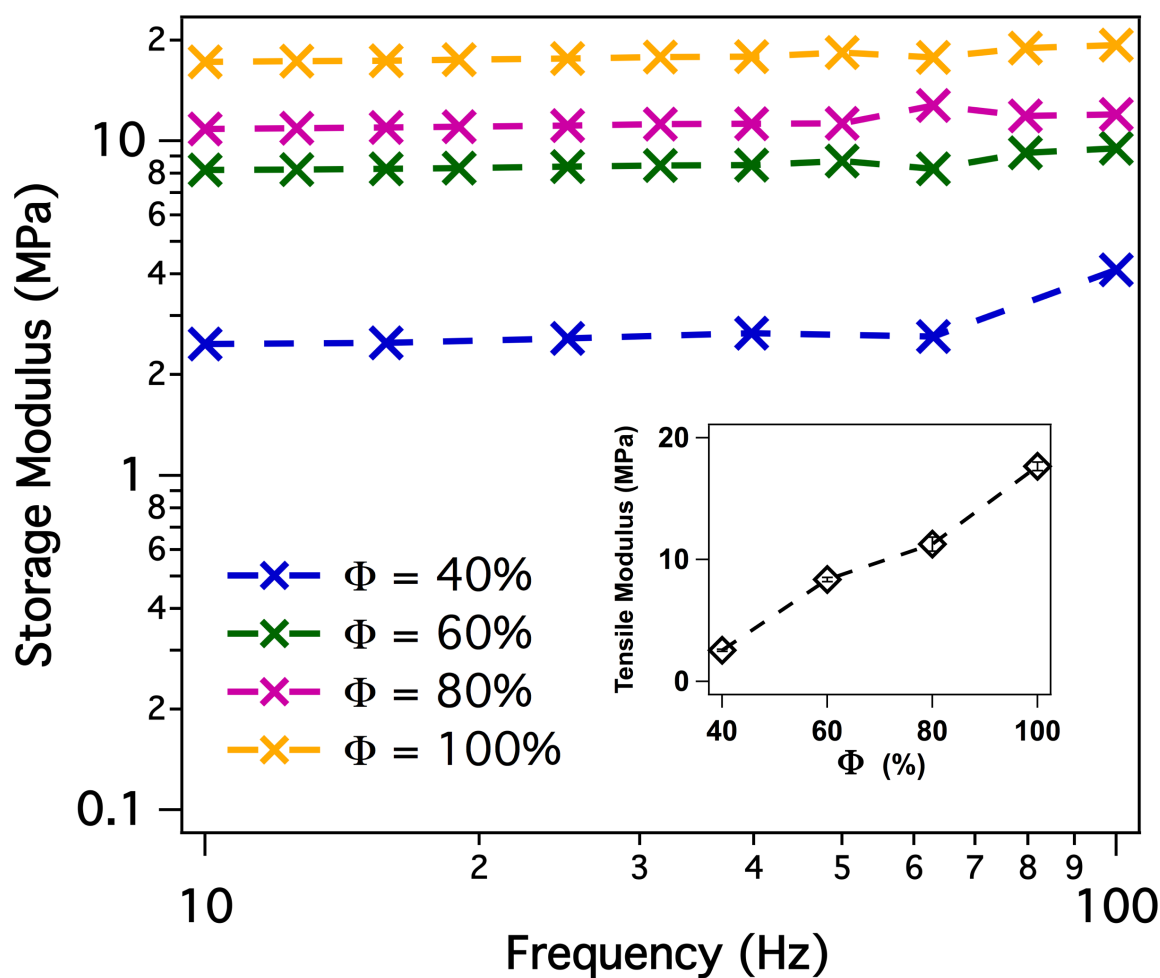

**Supplementary Fig. 3:** Tensile analysis of the crosslinked membrane at various PEGDMA content. The oscillatory tensile measurement was done on thin films at a low strain rate of 0.1% in the frequency range of 100-10Hz. The plateau modulus is plotted as a function of PEGDMA content in the inset.

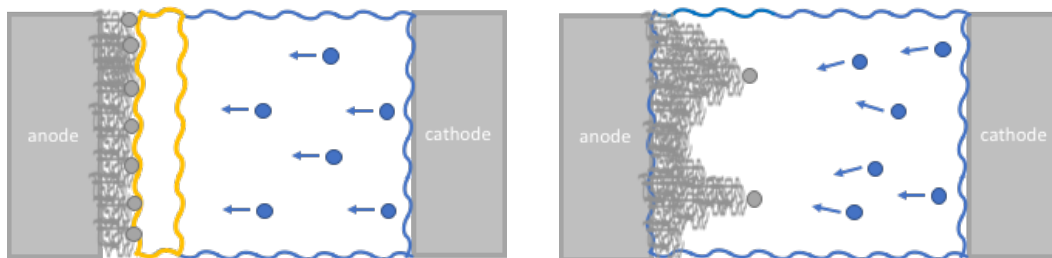

**Supplementary Fig. 4:** Schematic demonstrating the concept of stabilization using a solid polymer interphase.

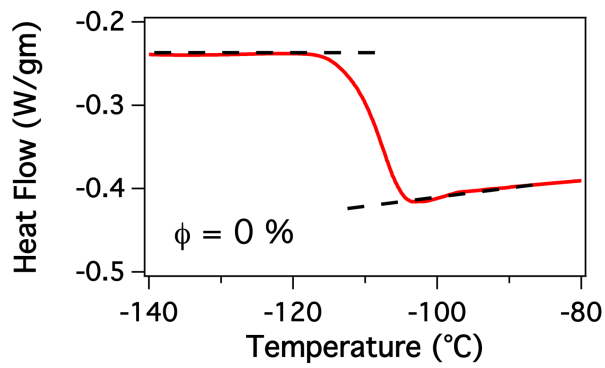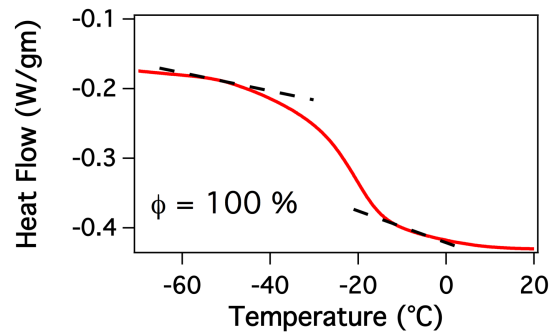

**Supplementary Fig. 5:** Thermograms obtained from Differential Scanning Calorimetry for pure diglyme ( $\Phi = 0\%$ ) and pure PEGDMA network ( $\Phi = 100\%$ ). The dotted lines mark the step-change in the heat-flow

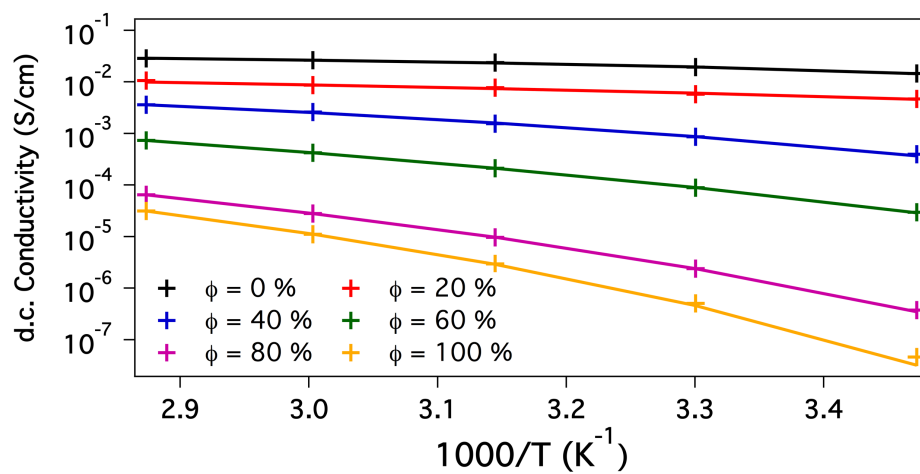

**Supplementary Fig. 6:** d.c. conductivity as a function of inverse absolute temperature. Measured values are shown as markers, and the data is fitted to Vogel Tamman Fulcher function.

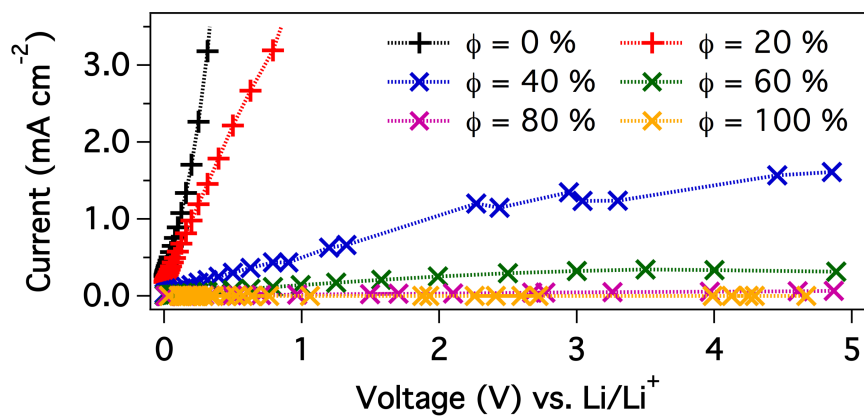

**Supplementary Fig. 7:** Current as a function of voltage. Divergence in current was seen for  $\Phi=0\%$  and  $\Phi=20\%$ , signaling the presence of electroconvection. For  $\Phi=40\%$  and beyond, the current reached a limiting value at higher voltages



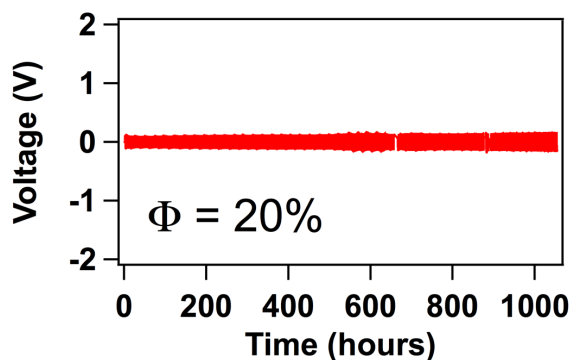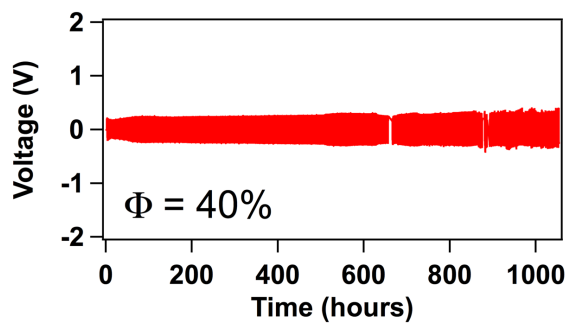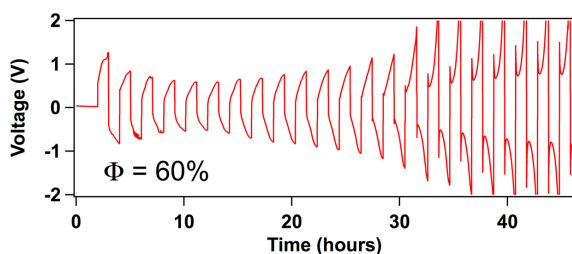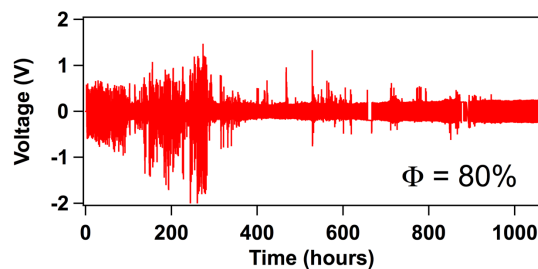

**Supplementary Fig. 8:** Voltage profiles of symmetric lithium cells with the solid polymer coatings on the electrode surface using the electrolyte 1M EC/DMC  $\text{LiPF}_6$  with a celgard separator. The batteries were subjected to a constant current density of  $0.5\text{mA}/\text{cm}^2$  with each charge and discharge cycle being one hour long. The different samples represent the polymer coating comprising of varying fraction of PEGDMA content.

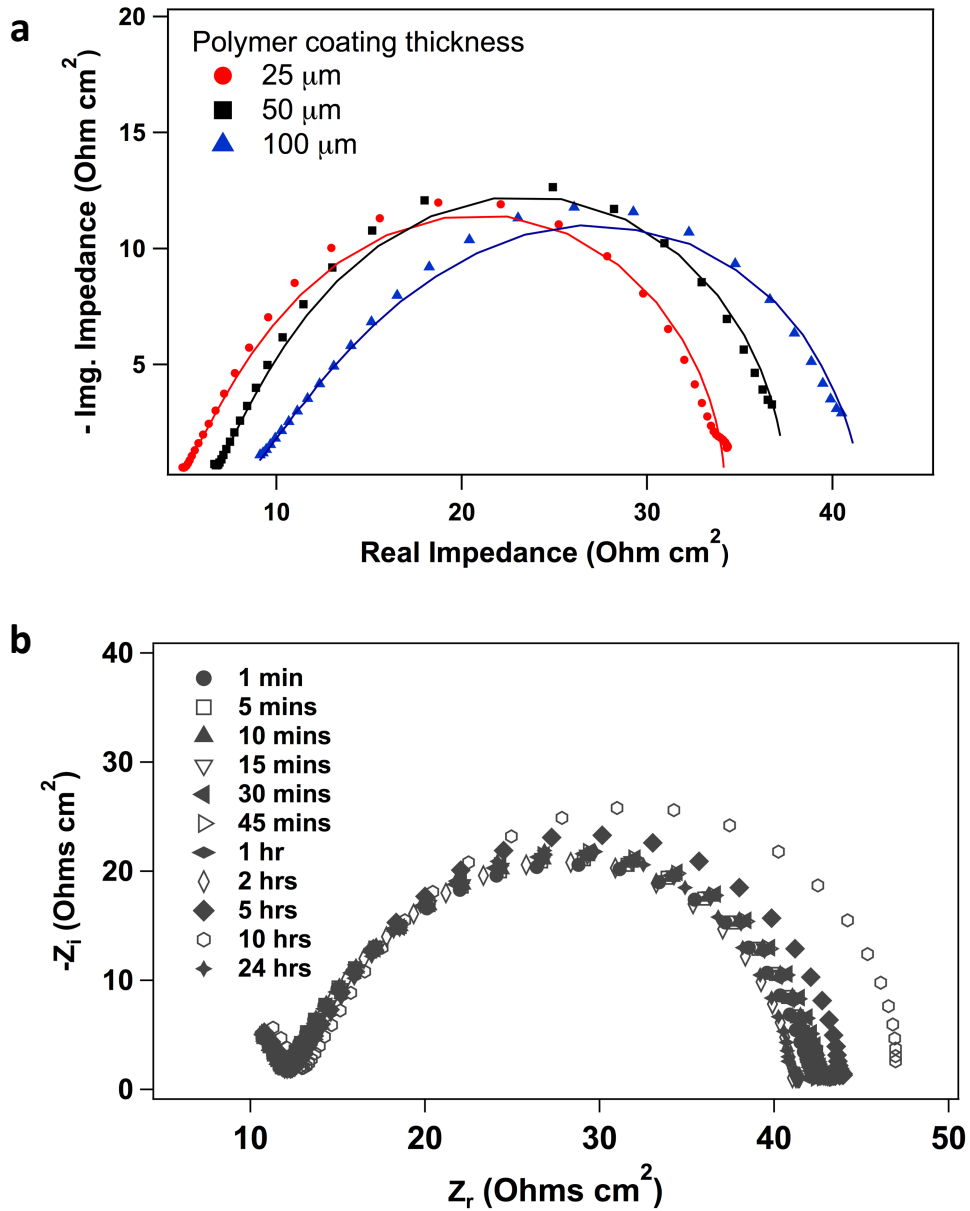

**Supplementary Fig. 9: Impedance analysis of solid polymer interphase: (a)** Nyquist plot showing the impedance spectra of symmetric Li cells coated with the solid polymer interphase, and the electrolyte utilized here is 1M EC/DMC LiPF<sub>6</sub>. The measurement was for different thicknesses **(b)** Nyquist diagrams for the 100 $\mu\text{m}$  SPI coated symmetric lithium cells, where the measurements were performed at different times of aging

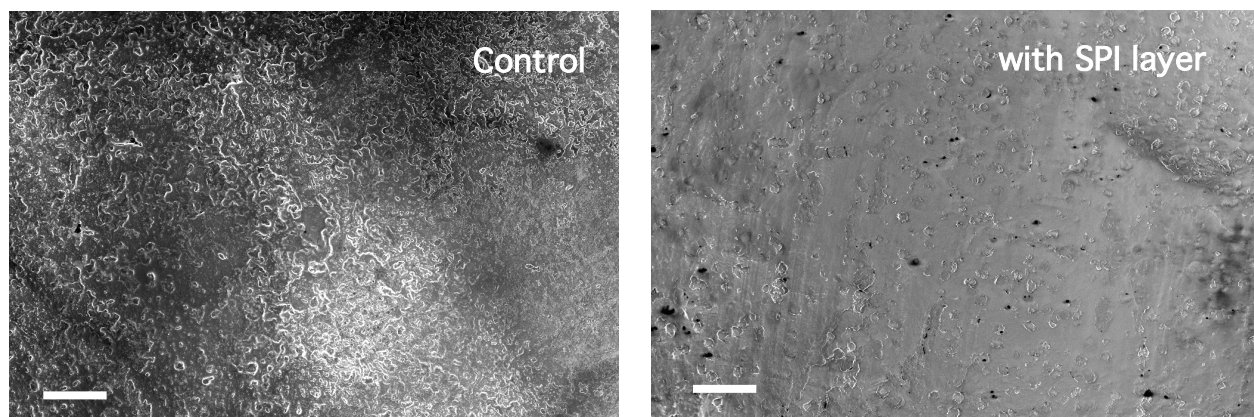

**Supplementary Fig. 10:** SEM micrographs showing the electrodeposition on metallic anode for one hour at the rate of  $1\text{mA}/\text{cm}^2$ . The left image is for a bare electrode while the right is for the electrode with a layer of the solid polymer coating. In both cases the electrolyte utilized was  $1\text{M LiPF}_6$  in EC/DMC. Both scale bars are  $100\mu\text{m}$ .

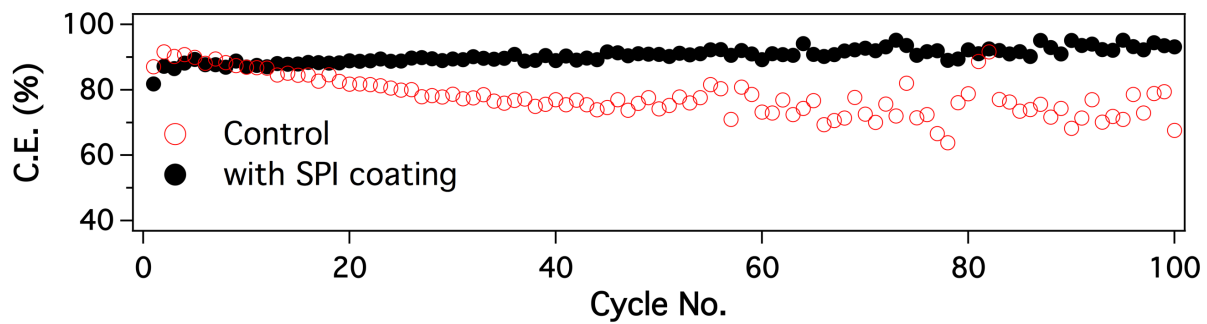

**Supplementary Fig. 11:** Coulombic efficiency measurement in Li || stainless steel coin cell with and without the solid polymer interphase at a current density of  $1 \text{ mA cm}^{-2}$  and capacity of  $1 \text{ mAh cm}^{-2}$ , using the  $1 \text{ M LiPF}_6$  in EC/DMC electrolyte.

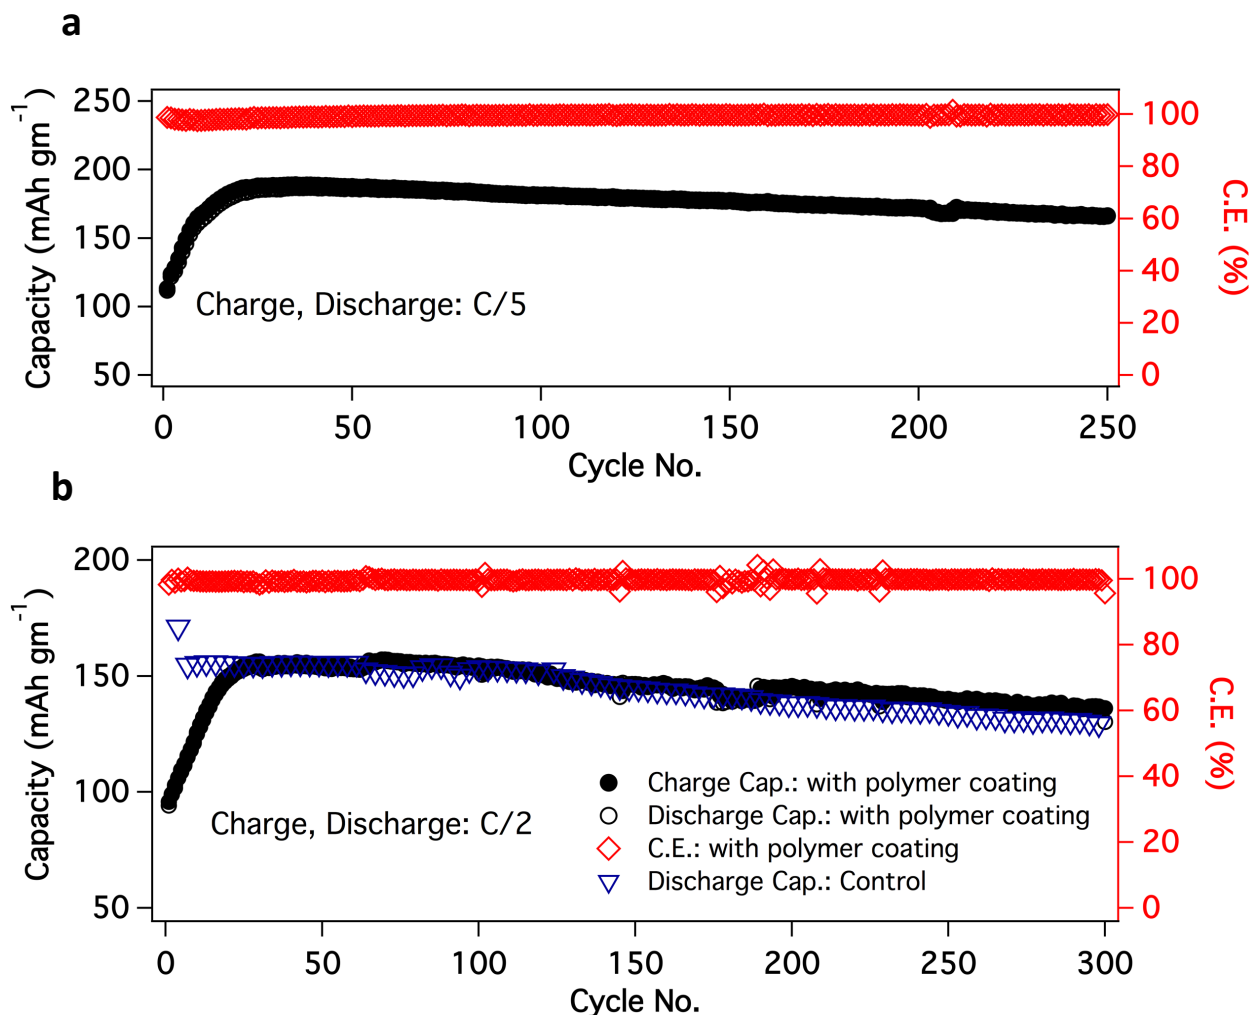

**Supplementary Fig. 12: Full cell analysis of solid polymer interphases:** Cycling performances for Li||NMC cells operated at a C-rate of (a) C/5 and (b) C/2. The data with black and red markers represents batteries having lithium metal electrode coated with the solid polymer interphase that comprises of the polymer network and diglyme, with PEGDMA content of 40%. The thickness of the polymer coating was  $\sim 100\mu\text{m}$ . The capacity of cathode is  $2\text{mAh/cm}^2$  and the electrolyte used here is 0.6M LiTFSI, 0.4M LiBOB, 0.05 LiPF<sub>6</sub> in EC/DMC (1:1 by wt.). The blue marker in part b, represent the cells without the polymer coating using the same electrolyte.

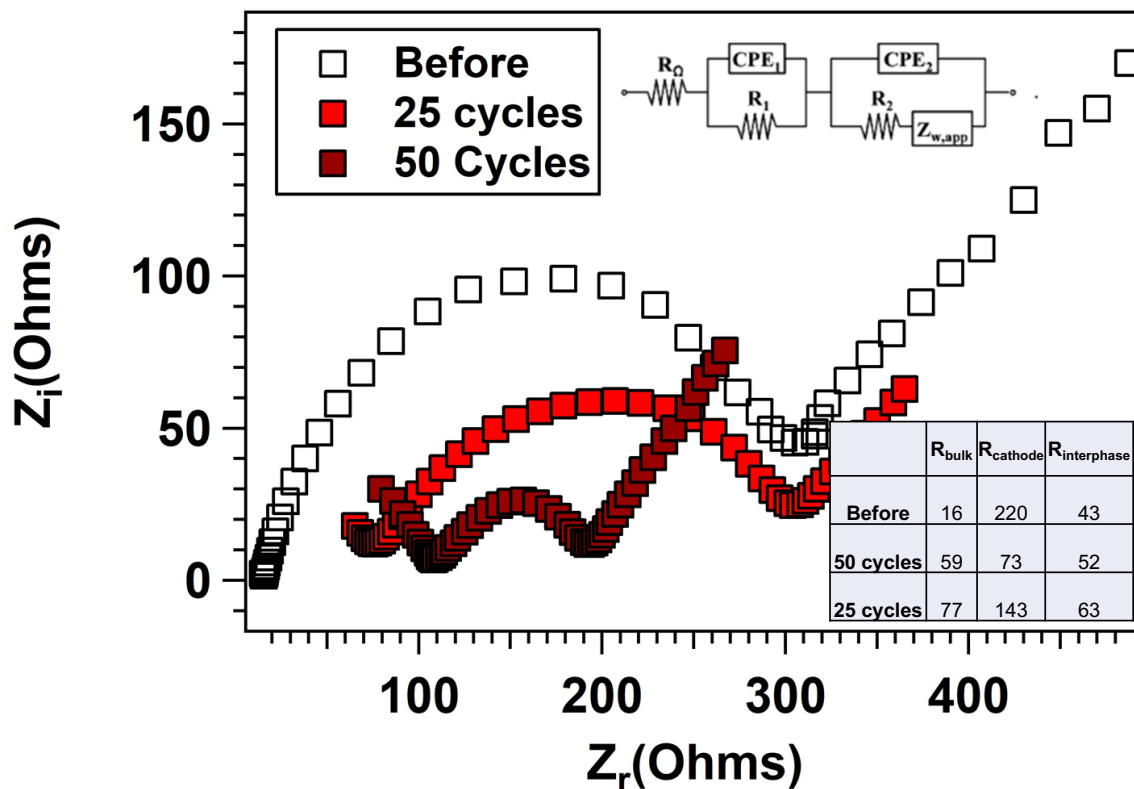

**Supplementary Fig. 13:** Impedance of Li@SPI|electrolyte|NMC full cell at different cycle numbers. The top inset shows the circuit model to extract the resistance values at the different interfaces and bulk electrolyte. The bottom right inset shows the resistance extracted from the impedance spectra using the same model

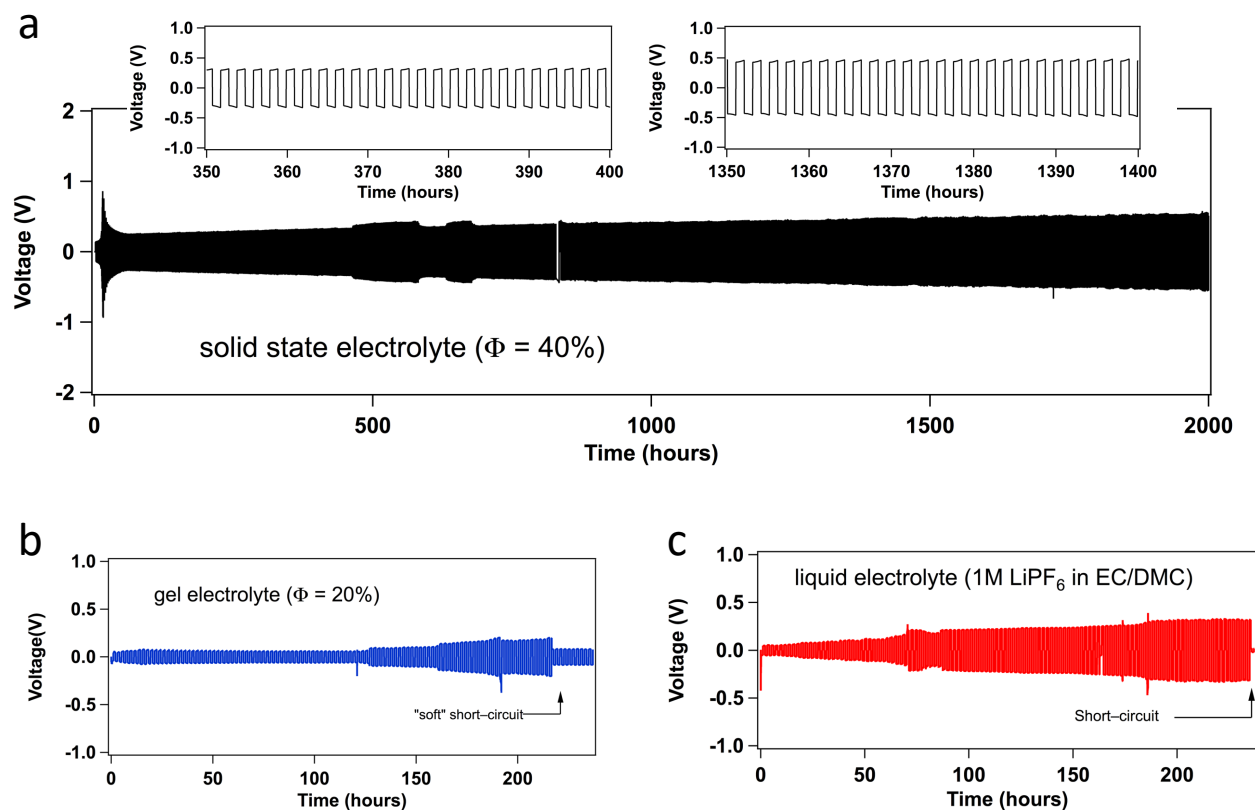

**Supplementary Fig. 14: Comparison of symmetric cell cycling using different electrolyte mechanics:** (a) Symmetric lithium metal battery cycling at a rate of  $0.5\text{mA}/\text{cm}^2$  with each half cycle being one hour. The electrolyte utilized was solid state polymer comprising of polymer network and diglyme, with PEGDMA content of 40% and with the salt  $\text{LiNO}_3$  (Li:EO = 0.10). The thickness of the solid polymer electrolyte was  $\sim 400\mu\text{m}$ . The inset shows the expanded voltage profiles at different time of cycling (b) cycling using same conditions as a, however the electrolyte used with PEGDMA content of 20% that has gel-like texture; (c) results for liquid electrolyte of 1M  $\text{LiPF}_6$  in EC/DMC (without any separator), instead an PTFE O-ring was used.

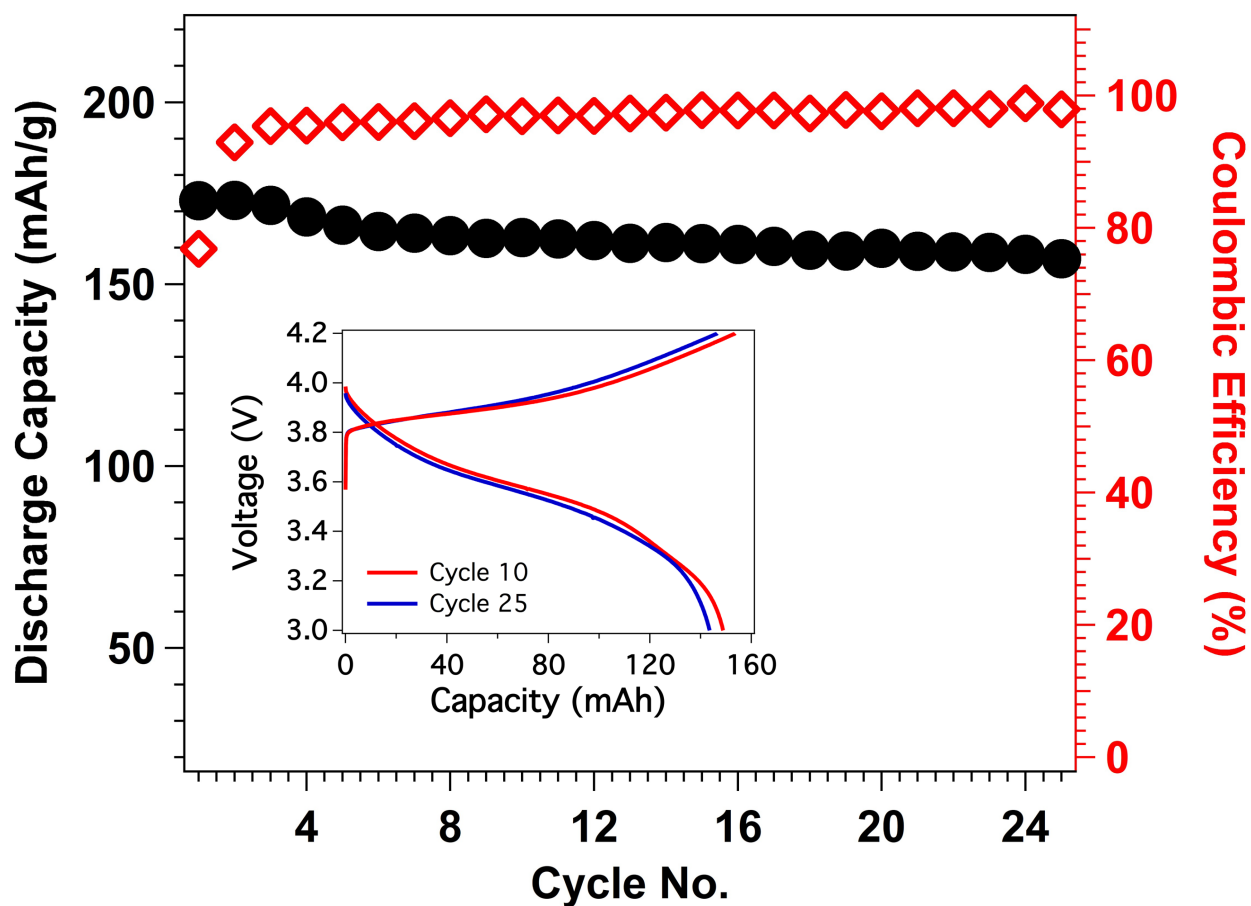

**Supplementary Fig. 15:** Cycling performances for Li||NMC cell operated at a C-rate of C/5. Here the electrolyte utilized was an all-solid state polymer electrolyte that comprises of the polymer network and diglyme, with PEGDMA content of 40% and with the salt  $\text{LiNO}_3$  (Li:EO = 0.10) and 0.4M LiBOB as additive. The thickness of the solid polymer electrolyte was  $\sim 400\mu\text{m}$ . The capacity of cathode is  $2\text{mAh}/\text{cm}^2$ . The cathode surface was wetted by liquid electrolyte of diglyme- $\text{LiNO}_3$  (Li:EO = 0.1) and 0.4M LiBOB.
